# Supplementary material for: The anti-apoptotic function of HSV-1 LAT in neuronal cell cultures but not its function during reactivation correlates with expression of two small non-coding RNAs, sncRNA1&2
Source: PubMed Central journal article supplement (PMC11192303; doi:10.1371/journal.ppat.1012307), 2024-06-10
Supplement: ppat.1012307.s001.pdf [file ppat.1012307.s001.pdf]

**A**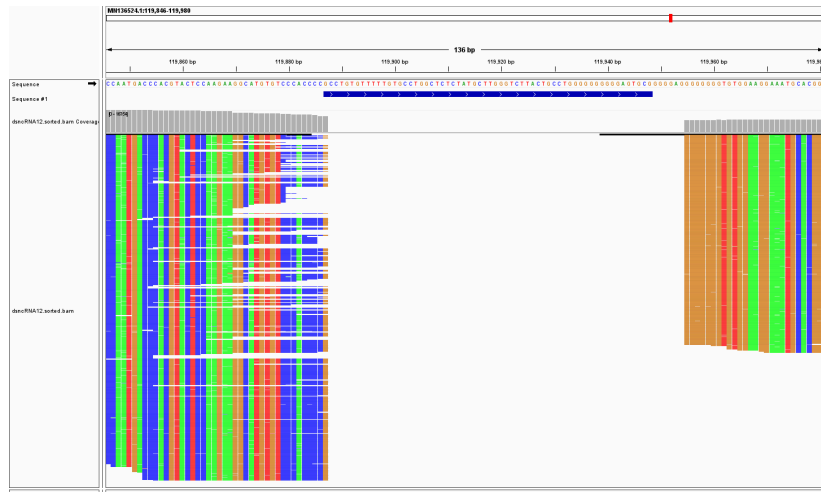**B**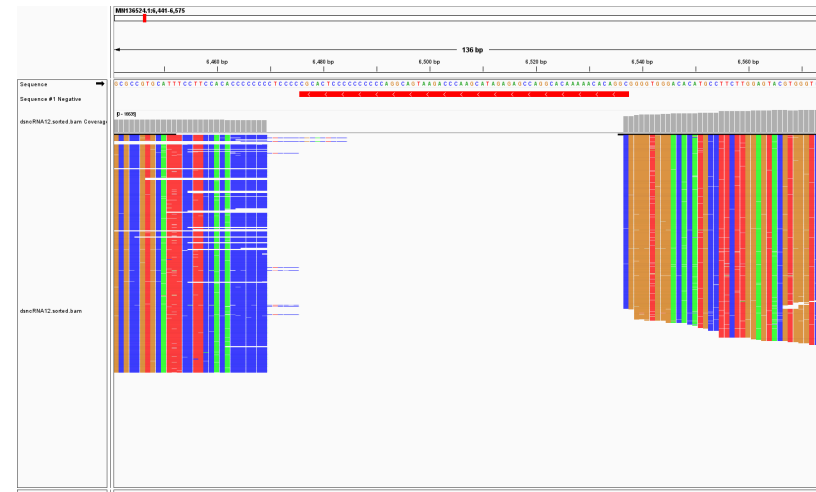**C**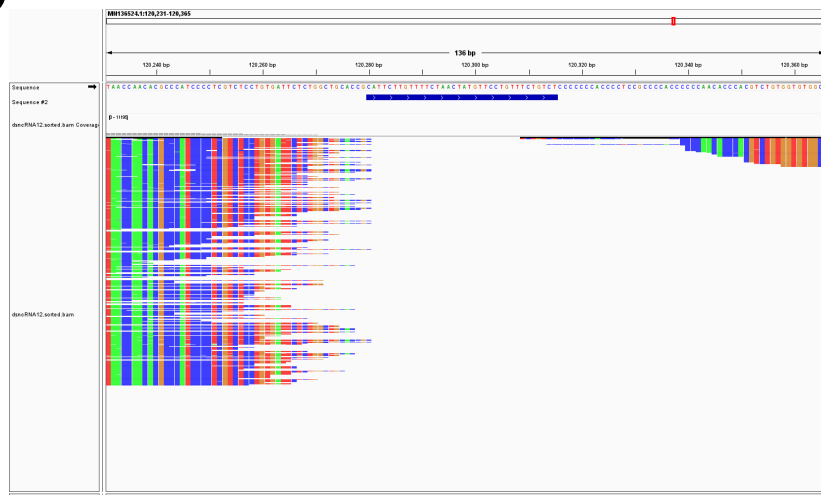**D**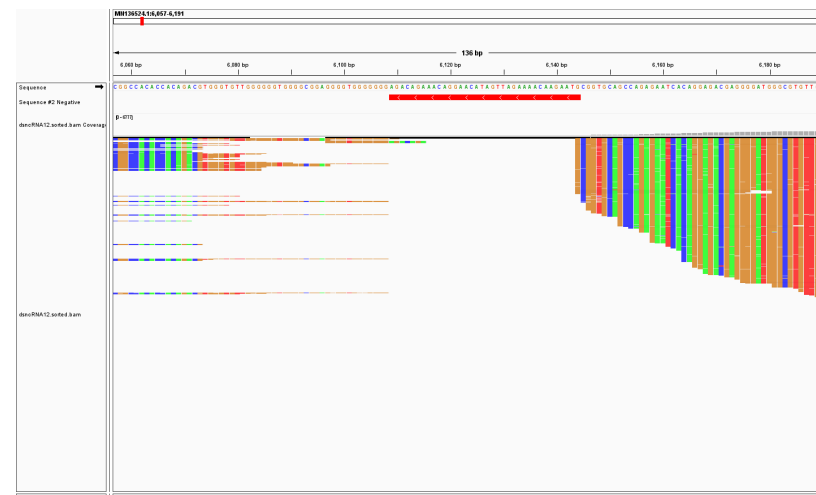

**Fig. S1. Complete genome sequencing of  $\Delta$ sncRNA1&2 recombinant virus.** Whole genome sequencing of  $\Delta$ sncRNA1&2 virus confirmed absence of (A and B) sncRNA1 sequence (5'-GCCTGTGTTTTTGTGCCTGGCTCTCTATGCTTGGGTCTTACTGCCTGGGGGGGGGAGTGCG-3') at (A) position 119,887 – 199,948 on positive strand and (B) 6,476 – 6,537 on negative strand, and absence of sncRNA2 sequence (5'-CATTCTTGTTTTCTAACTATGTTTCTGTTTCTGTCT-3) at position (C) 120,280 – 120,315 on positive strand and (D) 6,109 – 6,144 on negative strand.
