# Supplementary material for: The anti-apoptotic function of HSV-1 LAT in neuronal cell cultures but not its function during reactivation correlates with expression of two small non-coding RNAs, sncRNA1&2
Source: PubMed Central journal article supplement (PMC11192303; doi:10.1371/journal.ppat.1012307), 2024-06-10
Supplement: ppat.1012307.s002.pdf [file ppat.1012307.s002.pdf]

| Table format:<br><b>XY</b> |    | <b>X</b> | <b>Group A</b> |             |             | <b>Group B</b> |             |             | <b>Group C</b> |             |             |
|----------------------------|----|----------|----------------|-------------|-------------|----------------|-------------|-------------|----------------|-------------|-------------|
|                            |    | X Title  | sncRNA1&2      |             |             | McKrae         |             |             | dLAT2903       |             |             |
|                            |    | <b>X</b> | <b>A:Y1</b>    | <b>A:Y2</b> | <b>A:Y3</b> | <b>B:Y1</b>    | <b>B:Y2</b> | <b>B:Y3</b> | <b>C:Y1</b>    | <b>C:Y2</b> | <b>C:Y3</b> |
| <b>1</b>                   | 12 |          | 2500           | 1633        | 2417        | 500            | 567         | 500         | 1633           | 1500        | 1183        |
| <b>2</b>                   | 24 |          | 1275000        | 650000      | 1000000     | 2125000        | 1400000     | 1550000     | 550000         | 600000      | 675000      |
| <b>3</b>                   | 48 |          | 5250000        | 5500000     | 2750000     | 4750000        | 2250000     | 4250000     | 1750000        | 2250000     | 3000000     |

Data for Figure 2A\_Measuring Virus Yield in vitro 0.1 PFU/cell

| Table format:<br>Grouped |    | Group A   |         |         | Group B |         |         | Group C      |         |         |
|--------------------------|----|-----------|---------|---------|---------|---------|---------|--------------|---------|---------|
|                          |    | sncRNA1&2 |         |         | McKrae  |         |         | dLAT29032903 |         |         |
|                          |    | A:1       | A:2     | A:3     | B:1     | B:2     | B:3     | C:1          | C:2     | C:3     |
| 1                        | 12 | 87500     | 22500   | 45000   | 125000  | 62500   | 120000  | 20000        | 22500   | 57500   |
| 2                        | 24 | 6250000   | 4500000 | 2250000 | 4500000 | 6250000 | 5250000 | 2750000      | 3000000 | 2250000 |
| 3                        | 48 | 8500000   | 4250000 | 5750000 | 6250000 | 9000000 | 4750000 | 5000000      | 5000000 | 5000000 |

Data for Figure 2B\_Measuring virus yield in vitro\_1.0 PFU/Cell

| Table format:<br>Grouped |    | Group A    |            |            | Group B     |             |             | Group C   |           |           |
|--------------------------|----|------------|------------|------------|-------------|-------------|-------------|-----------|-----------|-----------|
|                          |    | sncRNA1&2  |            |            | McKrae      |             |             | dLAT2903  |           |           |
|                          |    | A:1        | A:2        | A:3        | B:1         | B:2         | B:3         | C:1       | C:2       | C:3       |
| 1                        | 12 | 500000.000 | 475000.000 | 375000.000 | 675000.000  | 525000.000  | 825000.000  | 450000.0  | 350000.0  | 450000.0  |
| 2                        | 24 | 1.750e+007 | 1.750e+007 | 1.500e+007 | 7250000.000 | 5000000.000 | 3250000.000 | 6500000.0 | 3750000.0 | 5750000.0 |
| 3                        | 48 | 2.625e+007 | 2.075e+007 | 2.075e+007 | 2.125e+007  | 2.150e+007  | 1.875e+007  | 2.6e+007  | 1.7e+007  | 1.8e+007  |

Data for Figure 2C\_Measuring virus yield in vitro 10 PFU/cell

| Table format:<br>XY |       | X                   | Gro   |       |      |       |       |      |      |      |      |       |
|---------------------|-------|---------------------|-------|-------|------|-------|-------|------|------|------|------|-------|
|                     |       | Days Post infection | Mck   |       |      |       |       |      |      |      |      |       |
|                     |       | X                   | A:Y1  | A:Y2  | A:Y3 | A:Y4  | A:Y5  | A:Y6 | A:Y7 | A:Y8 | A:Y9 | A:Y10 |
| 1                   | Title | 1                   | 940   | 1500  | 3560 | 690   | 2400  | 1840 | 1840 | 2480 | 2280 | 2160  |
| 2                   | Title | 2                   | 48000 | 29800 | 400  | 12600 | 51800 | 1600 | 800  | 6200 | 4600 | 200*  |
| 3                   | Title | 3                   | 1400  | 17000 | 400  | 200   | 0*    | 0*   | 600  | 800  | 600  | 400   |
| 4                   | Title | 4                   | 4800  | 0*    | 9200 | 4400  | 2000  | 5600 | 2000 | 3000 | 600* | 5000  |
| 5                   | Title | 5                   | 2000  | 150   | 950  | 470   | 1650  | 920  | 70   | 170  | 2060 | 3560  |
| 6                   | Title | 6                   | 0     | 90    | 190  | 0     | 0     | 0    | 120  | 20   | 0    | 0     |
| 7                   | Title | 7                   | 0     | 0     | 0    | 0     | 0     | 0    | 0    | 30   | 0    | 0     |

Data for Figure 3\_Eye Swab Virus Titer

| Group A |       |       |       |       |       |       |       |       |       |       |       |      |
|---------|-------|-------|-------|-------|-------|-------|-------|-------|-------|-------|-------|------|
| Krae    |       |       |       |       |       |       |       |       |       |       |       |      |
|         | A:Y11 | A:Y12 | A:Y13 | A:Y14 | A:Y15 | A:Y16 | A:Y17 | A:Y18 | A:Y19 | A:Y20 | B:Y1  | B:Y2 |
| 1       | 850   | 1120  | 450   | 210   | 3680  | 290   | 450   | 450   | 3560  | 850   | 1750  | 50   |
| 2       | 27600 | 14800 | 35400 | 600   | 46400 | 2400  | 600   | 600   | 41600 | 2000  | 400   | 4400 |
| 3       | 1200  | 2600  | 1200  | 11200 | 6400  | 200   | 5000  | 600   | 200   | 0*    | 40000 | 6000 |
| 4       | 24800 | 5600  | 5800  | 2600  | 1200  | 4800  | 1600  | 4600  | 4400  | 1000  | 800   | 3200 |
| 5       | 790   | 450   | 900   | 100   | 2760  | 2400  | 2360  | 1860  | 1010  | 1230  | 30    | 680  |
| 6       | 0     | 10    | 0     | 30    | 70    | 20    | 20    | 60    | 20    | 110   | 0     | 400  |
| 7       | 0     | 0     | 0     | 0     | 0     | 0     | 40    | 0     |       |       | 0     | 60   |

Data for Figure 3\_Eye Swab Virus Titer

| Group B    |      |      |       |       |      |      |       |       |       |       |       |       |
|------------|------|------|-------|-------|------|------|-------|-------|-------|-------|-------|-------|
| ΔsncRNA1&2 |      |      |       |       |      |      |       |       |       |       |       |       |
|            | B:Y3 | B:Y4 | B:Y5  | B:Y6  | B:Y7 | B:Y8 | B:Y9  | B:Y10 | B:Y11 | B:Y12 | B:Y13 | B:Y14 |
| 1          | 30   | 0    | 20    | 110   | 730  | 190  | 790   | 110   | 1590  | 90    | 10    | 330   |
| 2          | 9400 | 3000 | 17800 | 12800 | 4000 | 0*   | 7200  | 2200  | 3400  | 3000  | 11200 | 4400  |
| 3          | 200  | 600  | 200   | 0     | 0    | 600  | 3000  | 8000  | 1400  | 16800 | 600   | 0*    |
| 4          | 600  | 4600 | 400   | 600   | 3000 | 0    | 33600 | 2000  | 8000  | 0     | 2000  | 400   |
| 5          | 0    | 920  | 30    | 1790  | 20   | 1160 | 300   | 0     | 320   | 450   | 1600  | 4000  |
| 6          | 0    | 0    | 0     | 0     | 200  | 0    | 0     | 0     | 0     | 0     | 200   | 0     |
| 7          | 0    | 0    | 120   | 0     | 0    | 120  | 10    | 0     | 0     | 0     | 0     | 0     |

Data for Figure 3\_Eye Swab Virus Titer

|   | B:Y15 | B:Y16 | B:Y17 | B:Y18 | B:Y19 | B:Y20 | C:Y1  | C:Y2 | C:Y3 | C:Y4 | C:Y5  | C:Y6 |
|---|-------|-------|-------|-------|-------|-------|-------|------|------|------|-------|------|
| 1 | 350   | 880   | 1090  | 200   | 0     | 0     | 1560  | 3560 | 350  | 90   | 1740  | 80   |
| 2 | 9200  | 5200  | 0*    | 12400 | 4200  | 0*    | 14200 | 800  | 4400 | 1000 | 21600 | 8600 |
| 3 | 2400  | 1000  | 800   | 1800  | 200   | 0*    | 5200  | 0*   | 0*   | 2600 | 6400  | 3400 |
| 4 | 0     | 2800  | 11000 | 1400  | 0     | 5200  | 4600  | 2400 | 7200 | 2000 | 6400  | 9600 |
| 5 | 0     | 3000  | 2400  | 1700  | 480   | 480   | 200   | 400  | 800  | 600  | 200   | 600  |
| 6 | 0     | 0     | 0     | 0     | 0     | 0     | 600   | 0    | 0    | 0    | 600   | 0    |
| 7 | 0     | 0     | 0     | 230   |       |       | 0     | 430  | 0    | 0    | 0     | 0    |

Data for Figure 3\_Eye Swab Virus Titer

Group C

dLAT2903

|   | C:Y7 | C:Y8 | C:Y9  | C:Y10 | C:Y11 | C:Y12 | C:Y13 | C:Y14 | C:Y15 | C:Y16 | C:Y17 | C:Y18 |
|---|------|------|-------|-------|-------|-------|-------|-------|-------|-------|-------|-------|
| 1 | 220  | 90   | 640   | 1060  | 290   | 1720  | 2020  | 300   | 1640  | 110   | 90    | 1050  |
| 2 | 5000 | 7000 | 13200 | 5800  | 3000  | 18800 | 7000  | 12200 | 4000  | 15800 | 13400 | 9600  |
| 3 | 400  | 800  | 9400  | 1200  | 3200  | 2400  | 11400 | 7600  | 12800 | 14400 | 5000  | 5800  |
| 4 | 2800 | 1200 | 2000  | 1800  | 1600  | 6000  | 1000  | 5000  | 18800 | 2400  | 32000 | 800*  |
| 5 | 600  | 4000 | 2400  | 1200  | 12000 | 1000  | 3000  | 0     | 4200  | 4600  | 12800 | 2800  |
| 6 | 0    | 0    | 0     | 0     | 800   | 0     | 0     | 0     | 0     | 0     | 0     | 0     |
| 7 | 0    | 150  | 0     | 10    | 0     | 0     | 0     | 0     | 180   | 0     |       |       |

Data for Figure 3\_Eye Swab Virus Titer



|   | C:Y19 | C:Y20 |
|---|-------|-------|
| 1 | 70    | 2640  |
| 2 | 9600  | 17400 |
| 3 | 0*    | 1600  |
| 4 | 2600  | 6600  |
| 5 | 2600  | 1600  |
| 6 | 0     | 0     |
| 7 |       |       |

Data for Figure 3\_Eye Swab Virus Titer

| Table format:<br>XY |       | X                   | Group A | Group B            | Group C  |
|---------------------|-------|---------------------|---------|--------------------|----------|
|                     |       | Days Post Infection | McKrae  | $\Delta$ sncRNA1&2 | dLAT2903 |
|                     |       | X                   | Y       | Y                  | Y        |
| 1                   | Title | 7                   | 1       | 1                  | 1        |
| 2                   | Title | 7                   |         |                    | 1        |
| 3                   | Title | 8                   |         |                    |          |
| 4                   | Title | 8                   |         |                    |          |
| 5                   | Title | 9                   | 1       | 1                  | 1        |
| 6                   | Title | 9                   |         | 1                  | 1        |
| 7                   | Title | 9                   |         | 1                  |          |
| 8                   | Title | 10                  |         |                    |          |
| 9                   | Title | 10                  |         |                    |          |
| 10                  | Title | 11                  |         |                    |          |
| 11                  | Title | 12                  |         |                    |          |
| 12                  | Title | 13                  |         |                    |          |
| 13                  | Title | 14                  | 1       |                    |          |
| 14                  | Title | 14                  | 0       | 0                  | 0        |
| 15                  | Title | 14                  | 0       | 0                  | 0        |
| 16                  | Title | 15                  | 0       | 0                  | 0        |
| 17                  | Title | 15                  | 0       | 0                  | 0        |
| 18                  | Title | 15                  | 0       | 0                  | 0        |
| 19                  | Title | 15                  | 0       | 0                  | 0        |
| 20                  | Title | 28                  | 0       | 0                  | 0        |
| 21                  | Title | 28                  | 0       | 0                  | 0        |
| 22                  | Title | 28                  | 0       | 0                  | 0        |
| 23                  | Title | 28                  | 0       | 0                  | 0        |
| 24                  | Title | 7                   | 1       | 1                  |          |
| 25                  | Title | 8                   |         |                    |          |
| 26                  | Title | 8                   |         |                    |          |
| 27                  | Title | 8                   |         |                    |          |
| 28                  | Title | 9                   | 1       |                    |          |
| 29                  | Title | 9                   | 1       |                    |          |
| 30                  | Title | 9                   |         |                    |          |
| 31                  | Title | 10                  | 1       |                    |          |

Data for Figure 4A\_Survival

| Table format:<br>XY |       | X                   | Group A | Group B            | Group C  |
|---------------------|-------|---------------------|---------|--------------------|----------|
|                     |       | Days Post Infection | McKrae  | $\Delta$ sncRNA1&2 | dLAT2903 |
|                     |       | X                   | Y       | Y                  | Y        |
| 32                  | Title | 10                  |         |                    |          |
| 33                  | Title | 11                  |         |                    |          |
| 34                  | Title | 12                  |         |                    |          |
| 35                  | Title | 13                  | 1       |                    |          |
| 36                  | Title | 13                  |         |                    |          |
| 37                  | Title | 14                  | 0       | 0                  | 0        |
| 38                  | Title | 14                  | 0       | 0                  | 0        |
| 39                  | Title | 15                  | 0       | 0                  | 0        |
| 40                  | Title | 15                  | 0       | 0                  | 0        |
| 41                  | Title | 15                  | 0       | 0                  | 0        |
| 42                  | Title | 15                  | 0       | 0                  | 0        |
| 43                  | Title | 28                  | 0       | 0                  | 0        |
| 44                  | Title | 28                  | 0       | 0                  | 0        |
| 45                  | Title | 28                  | 0       | 0                  | 0        |
| 46                  | Title | 28                  | 0       | 0                  | 0        |
| 47                  | Title | 9                   | 1       | 1                  | 1        |
| 48                  | Title | 9                   | 1       | 1                  | 1        |
| 49                  | Title | 9                   |         |                    |          |
| 50                  | Title | 9                   |         |                    |          |
| 51                  | Title | 9                   |         |                    |          |
| 52                  | Title | 9                   |         |                    |          |
| 53                  | Title | 9                   |         |                    |          |
| 54                  | Title | 10                  |         |                    | 1        |
| 55                  | Title | 10                  |         |                    |          |
| 56                  | Title | 11                  |         |                    |          |
| 57                  | Title | 12                  |         |                    |          |
| 58                  | Title | 13                  |         |                    |          |
| 59                  | Title | 13                  |         |                    |          |
| 60                  | Title | 14                  | 0       | 0                  | 0        |
| 61                  | Title | 14                  | 0       | 0                  | 0        |
| 62                  | Title | 15                  | 0       | 0                  | 0        |

Data for Figure 4\_Survival

| Table format:<br>XY |       | X                   | Group A | Group B            | Group C  |
|---------------------|-------|---------------------|---------|--------------------|----------|
|                     |       | Days Post Infection | McKrae  | $\Delta$ sncRNA1&2 | dLAT2903 |
|                     |       | X                   | Y       | Y                  | Y        |
| 63                  | Title | 15                  | 0       | 0                  | 0        |
| 64                  | Title | 15                  | 0       | 0                  | 0        |
| 65                  | Title | 15                  | 0       | 0                  | 0        |
| 66                  | Title | 28                  | 0       | 0                  | 0        |
| 67                  | Title | 28                  | 0       | 0                  | 0        |
| 68                  | Title | 28                  | 0       | 0                  | 0        |
| 69                  | Title | 28                  | 0       | 0                  | 0        |
| 70                  | Title | 9                   |         | 1                  |          |
| 71                  | Title | 9                   |         | 1                  |          |
| 72                  | Title | 9                   |         | 1                  |          |
| 73                  | Title | 9                   |         |                    |          |
| 74                  | Title | 9                   |         |                    |          |
| 75                  | Title | 9                   |         |                    |          |
| 76                  | Title | 9                   |         |                    |          |
| 77                  | Title | 10                  |         |                    |          |
| 78                  | Title | 10                  |         |                    |          |
| 79                  | Title | 11                  | 1       |                    |          |
| 80                  | Title | 11                  | 0       | 0                  | 0        |
| 81                  | Title | 11                  | 0       | 0                  | 0        |
| 82                  | Title | 11                  | 0       | 0                  | 0        |
| 83                  | Title | 12                  |         |                    |          |
| 84                  | Title | 13                  |         |                    |          |
| 85                  | Title | 13                  |         |                    |          |
| 86                  | Title | 14                  | 0       | 0                  | 0        |
| 87                  | Title | 14                  | 0       | 0                  | 0        |
| 88                  | Title | 15                  | 0       | 0                  | 0        |
| 89                  | Title | 15                  | 0       | 0                  | 0        |
| 90                  | Title | 15                  | 0       | 0                  | 0        |
| 91                  | Title | 15                  | 0       | 0                  | 0        |
| 92                  | Title | 28                  | 0       | 0                  | 0        |
| 93                  | Title | 28                  | 0       | 0                  | 0        |

Data for Figure 4A\_Survival

| Table format:<br>XY |       | X                   | Group A | Group B            | Group C  |
|---------------------|-------|---------------------|---------|--------------------|----------|
|                     |       | Days Post Infection | McKrae  | $\Delta$ sncRNA1&2 | dLAT2903 |
|                     |       | X                   | Y       | Y                  | Y        |
| 94                  | Title | 28                  | 0       | 0                  | 0        |
| 95                  | Title | 28                  | 0       | 0                  | 0        |
| 96                  | Title | 8                   | 1       | 1                  |          |
| 97                  | Title | 8                   |         | 1                  |          |
| 98                  | Title | 8                   |         |                    |          |
| 99                  | Title | 9                   |         |                    |          |
| 100                 | Title | 9                   |         |                    |          |
| 101                 | Title | 9                   |         |                    |          |
| 102                 | Title | 10                  |         |                    |          |
| 103                 | Title | 10                  |         |                    |          |
| 104                 | Title | 11                  |         |                    |          |
| 105                 | Title | 12                  |         |                    |          |
| 106                 | Title | 13                  |         |                    |          |
| 107                 | Title | 13                  |         |                    |          |
| 108                 | Title | 14                  | 0       | 0                  | 0        |
| 109                 | Title | 14                  | 0       | 0                  | 0        |
| 110                 | Title | 15                  | 0       | 0                  | 0        |
| 111                 | Title | 15                  | 0       | 0                  | 0        |
| 112                 | Title | 15                  | 0       | 0                  | 0        |
| 113                 | Title | 15                  | 0       | 0                  | 0        |
| 114                 | Title | 28                  | 0       | 0                  | 0        |
| 115                 | Title | 28                  | 0       | 0                  | 0        |
| 116                 | Title | 28                  | 0       | 0                  | 0        |
| 117                 | Title | 28                  | 0       | 0                  | 0        |

Data for Figure 4A\_Survival

| Table format:<br><b>XY</b> |       | X       |      |      |      |      |      |      |      |      |      |       |       |
|----------------------------|-------|---------|------|------|------|------|------|------|------|------|------|-------|-------|
|                            |       | X Title |      |      |      |      |      |      |      |      |      |       |       |
|                            |       | X       | A:Y1 | A:Y2 | A:Y3 | A:Y4 | A:Y5 | A:Y6 | A:Y7 | A:Y8 | A:Y9 | A:Y10 | A:Y11 |
| 1                          | Title |         | 2.0  | 3    | 3.5  | 3    | 0    | 4    | 1    | 0.5* | 5    | 2     | 4.5   |

Data for Figure 4B\_Corneal Scarring

|   | A:Y12 | A:Y13 | A:Y14 | A:Y15 | A:Y16 | A:Y17 | A:Y18 | A:Y19 | A:Y20 | A:Y21 | A:Y22 | A:Y23 |
|---|-------|-------|-------|-------|-------|-------|-------|-------|-------|-------|-------|-------|
| 1 | 5     | 1     | 0.5*  | 3     | 4     | 1     | 1     | 1     | 3.5   | 4     | 3.5   | 1     |

Data for Figure 4B\_Corneal Scarring

|   | A:Y24 | A:Y25 | A:Y26 | A:Y27 | A:Y28 | A:Y29 | A:Y30 | A:Y31 | A:Y32 | A:Y33 | A:Y34 | A:Y35 |
|---|-------|-------|-------|-------|-------|-------|-------|-------|-------|-------|-------|-------|
| 1 | 1     | 1     | 1     | 1     | 0.5   | 4     | 2     | 4     | 2.5   | 0.5   | 0.5   | 4     |

Data for Figure 4B\_Corneal Scarring



|   | A:Y36 | A:Y37 | A:Y38 | A:Y39 | A:Y40 | A:Y41 | A:Y42 | A:Y43 | A:Y44 | A:Y45 | A:Y46 | A:Y47 |
|---|-------|-------|-------|-------|-------|-------|-------|-------|-------|-------|-------|-------|
| 1 | 5     | 2     | 4     | 1     | 2.5   | 3.5   | 5     | 1     | 1.5   | 4     | 1     | 1.5   |

Data for Figure 4B\_Corneal Scarring

|   | A:Y48 | A:Y49 | A:Y50 | A:Y51 | A:Y52 | A:Y53 | A:Y54 | A:Y55 | A:Y56 | A:Y57 | A:Y58 | A:Y59 |
|---|-------|-------|-------|-------|-------|-------|-------|-------|-------|-------|-------|-------|
| 1 | 4     | 1.5   | 1     | 3     | 4     | 1     | 0.5   | 1.5   | 0.5   | 0.5   | 1     | 4     |

Data for Figure 4B Corneal Scarring

|   | A:Y60 | A:Y61 | A:Y62 | A:Y63 | A:Y64 | A:Y65 | A:Y66 | A:Y67 | A:Y68 | A:Y69 | A:Y70 | A:Y71 |
|---|-------|-------|-------|-------|-------|-------|-------|-------|-------|-------|-------|-------|
| 1 | 1     | 1     | 4     | 1.5   | 4     | 3     | 4     | 1.5   | 2     | 4     | 4     | 0.5   |

Data for Figure 4B Corneal Scarring

| Group A |       |       |       |       |       |       |       |       |       |       |       |       |
|---------|-------|-------|-------|-------|-------|-------|-------|-------|-------|-------|-------|-------|
| McKrae  |       |       |       |       |       |       |       |       |       |       |       |       |
|         | A:Y72 | A:Y73 | A:Y74 | A:Y75 | A:Y76 | A:Y77 | A:Y78 | A:Y79 | A:Y80 | A:Y81 | A:Y82 | A:Y83 |
| 1       | 0     | 0     | 0.0   | 0     | 3.5   | 0.0   | 4.0   | 0.0   | 4.0   | 2.0   | 0.5   | 0.0   |

Data for Figure 4B Corneal Scarring

|   | A:Y84 | A:Y85 | A:Y86 | A:Y87 | A:Y88 | A:Y89 | A:Y90 | A:Y91 | A:Y92 | A:Y93 | A:Y94 | A:Y95 |
|---|-------|-------|-------|-------|-------|-------|-------|-------|-------|-------|-------|-------|
| 1 | 2.0   | 0.75  | 0.0   | 1.0   | 0.0   | 4.0   | 0.0   | 0.0   | 0.0   | 0.0   | 0.0   | 3.5   |

Data for Figure 4B Corneal Scarring

|   | A:Y96 | A:Y97 | A:Y98 | A:Y99 | A:Y100 | A:Y101 | A:Y102 | A:Y103 | A:Y104 | A:Y105 | A:Y106 | A:Y107 |
|---|-------|-------|-------|-------|--------|--------|--------|--------|--------|--------|--------|--------|
| 1 | 0.0   | 0.0   | 2.0   | 2.0   | 0.0    | 2.0    | 4.0    | 4.0    | 2.0    | 0.5    | 0.00   | 3.0    |

Data for Figure 4B Corneal Scarring

|   | A:Y108 | A:Y109 | A:Y110 | A:Y111 | A:Y112 | A:Y113 | A:Y114 | A:Y115 | A:Y116 | A:Y117 | A:Y118 | A:Y119 |
|---|--------|--------|--------|--------|--------|--------|--------|--------|--------|--------|--------|--------|
| 1 | 0.0    | 0.0    | 0.75   | 3.5    | 1.0    | 0.5    | 3.0    | 4.0    | 1.0    | 2.5    | 0.0    | 3.0    |

Data for Figure 4B\_Corneal Scarring

|   | A:Y120 | A:Y121 | A:Y122 | A:Y123 | A:Y124 | A:Y125 | A:Y126 | A:Y127 | A:Y128 | A:Y129 | A:Y130 | A:Y131 |
|---|--------|--------|--------|--------|--------|--------|--------|--------|--------|--------|--------|--------|
| 1 | 3.0    | 0.0    | 0.0    | 4.0    | 2.0    | 4.0    | 1.5    | 2.0    | 0.0    |        |        |        |

Data for Figure 4B\_Corneal Scarring



|   | A:Y132 | A:Y133 | A:Y134 | A:Y135 | A:Y136 | A:Y137 | A:Y138 | A:Y139 | A:Y140 | A:Y141 | A:Y142 | A:Y143 |
|---|--------|--------|--------|--------|--------|--------|--------|--------|--------|--------|--------|--------|
| 1 |        |        |        |        |        |        |        |        |        |        |        |        |

Data for Figure 4B. Corneal Scarring

|   | B:Y1 | B:Y2 | B:Y3 | B:Y4 | B:Y5 | B:Y6 | B:Y7 | B:Y8 | B:Y9 | B:Y10 | B:Y11 | B:Y12 |
|---|------|------|------|------|------|------|------|------|------|-------|-------|-------|
| 1 | 0*   | 4    | 4    | 4.5  | 4    | 3    | 1    | 4.0  | 4.5  | 4.5   | 4     | 1     |

Data for Figure 4B\_Corneal Scarring

|   | B:Y13 | B:Y14 | B:Y15 | B:Y16 | B:Y17 | B:Y18 | B:Y19 | B:Y20 | B:Y21 | B:Y22 | B:Y23 | B:Y24 |
|---|-------|-------|-------|-------|-------|-------|-------|-------|-------|-------|-------|-------|
| 1 | 0.5   | 0.5   | 0.5   | 1.5   | 1     | 0.5   | 0.5   | 2.5   | 0.5   | 0.5   | 0.5   | 1.5   |

Data for Figure 4B. Corneal Scarring

|   | B:Y25 | B:Y26 | B:Y27 | B:Y28 | B:Y29 | B:Y30 | B:Y31 | B:Y32 | B:Y33 | B:Y34 | B:Y35 | B:Y36 |
|---|-------|-------|-------|-------|-------|-------|-------|-------|-------|-------|-------|-------|
| 1 | 1     | 1.5   | 1     | 0.5   | 5     | 2     | 1     | 2.5   | 0     | 0.5   | 0.5   | 2     |

Data for Figure 4B\_Corneal Scarring

|   | B:Y37 | B:Y38 | B:Y39 | B:Y40 | B:Y41 | B:Y42 | B:Y43 | B:Y44 | B:Y45 | B:Y46 | B:Y47 | B:Y48 |
|---|-------|-------|-------|-------|-------|-------|-------|-------|-------|-------|-------|-------|
| 1 | 0.5   | 1     | 0.5   | 0.5   | 4     | 3.5   | 3.5   | 4     | 3     | 4     | 0.5   | 0.5   |

Data for Figure 4B Corneal Scarring

|   | B:Y49 | B:Y50 | B:Y51 | B:Y52 | B:Y53 | B:Y54 | B:Y55 | B:Y56 | B:Y57 | B:Y58 | B:Y59 | B:Y60 |
|---|-------|-------|-------|-------|-------|-------|-------|-------|-------|-------|-------|-------|
| 1 | 3.5   | 4     | 4     | 4     | 2.5   | 1     | 4     | 4.5   | 0     | 0.5   | 1     | 1.5   |

Data for Figure 4B\_Corneal Scarring

Group B

$\Delta$ sncRNA1&2

|   | B:Y61 | B:Y62 | B:Y63 | B:Y64 | B:Y65 | B:Y66 | B:Y67 | B:Y68 | B:Y69 | B:Y70 | B:Y71 | B:Y72 |
|---|-------|-------|-------|-------|-------|-------|-------|-------|-------|-------|-------|-------|
| 1 | 1     | 0.5   | 1.5   | 4     | 0.5   | 0.5   | 1     | 1     | 1.5   | 3     | 1     | 4     |

Data for Figure 4B Corneal Scarring

|   | B:Y73 | B:Y74 | B:Y75 | B:Y76 | B:Y77 | B:Y78 | B:Y79 | B:Y80 | B:Y81 | B:Y82 | B:Y83 | B:Y84 |
|---|-------|-------|-------|-------|-------|-------|-------|-------|-------|-------|-------|-------|
| 1 | 0.5   | 4     | 1     | 4     | 0.5   | 0     | 4     | 2.5   | 0     | 4     | 0     | 0     |

Data for Figure 4B\_Corneal Scarring



|   | B:Y85 | B:Y86 | B:Y87 | B:Y88 | B:Y89 | B:Y90 | B:Y91 | B:Y92 | B:Y93 | B:Y94 | B:Y95 | B:Y96 |
|---|-------|-------|-------|-------|-------|-------|-------|-------|-------|-------|-------|-------|
| 1 | 3     | 4     | 0     | 4     | 2     | 0.5   | 3.5   | 4     | 0     | 1     | 0     | 3     |

Data for Figure 4B\_Corneal Scarring

|   | B:Y97 | B:Y98 | B:Y99 | B:Y100 | B:Y101 | B:Y102 | B:Y103 | B:Y104 | B:Y105 | B:Y106 | B:Y107 | B:Y108 |
|---|-------|-------|-------|--------|--------|--------|--------|--------|--------|--------|--------|--------|
| 1 | 0     | 4     | 4     | 0.5    | 4      | 4      | 2.5    | 0.5    | 0      | 2      | 4      | 4      |

Data for Figure 4B\_Corneal Scarring

|   | B:Y109 | B:Y110 | B:Y111 | B:Y112 | B:Y113 | B:Y114 | B:Y115 | B:Y116 | B:Y117 | B:Y118 | B:Y119 | B:Y120 |
|---|--------|--------|--------|--------|--------|--------|--------|--------|--------|--------|--------|--------|
| 1 | 2      | 0      | 0      | 0      | 1      | 1.5    | 3      | 2.5    | 3.5    | 3      | 1      | 0.75   |

Data for Figure 4B\_Corneal Scarring

|   | B:Y121 | B:Y122 | B:Y123 | B:Y124 | B:Y125 | B:Y126 | B:Y127 | B:Y128 | B:Y129 | B:Y130 | B:Y131 | B:Y132 |
|---|--------|--------|--------|--------|--------|--------|--------|--------|--------|--------|--------|--------|
| 1 | 3.5    | 4      | 0      | 4      | 4      | 1      | 0      | 4      |        |        |        |        |

Data for Figure 4B\_Corneal Scarring

|   |        |        |        |        |        |        |        |        |        |        |        |      |
|---|--------|--------|--------|--------|--------|--------|--------|--------|--------|--------|--------|------|
|   |        |        |        |        |        |        |        |        |        |        |        |      |
|   | B:Y133 | B:Y134 | B:Y135 | B:Y136 | B:Y137 | B:Y138 | B:Y139 | B:Y140 | B:Y141 | B:Y142 | B:Y143 | C:Y1 |
| 1 |        |        |        |        |        |        |        |        |        |        |        | 1    |

Data for Figure 4B Corneal Scarring

|   | C:Y2 | C:Y3 | C:Y4 | C:Y5 | C:Y6 | C:Y7 | C:Y8 | C:Y9 | C:Y10 | C:Y11 | C:Y12 | C:Y13 |
|---|------|------|------|------|------|------|------|------|-------|-------|-------|-------|
| 1 | 4    | 5    | 4    | 1    | 5    | 4    | 3.5  | 4    | 4     | 1     | 4     | 0.5   |

Data for Figure 4B\_Corneal Scarring

|   | C:Y14 | C:Y15 | C:Y16 | C:Y17 | C:Y18 | C:Y19 | C:Y20 | C:Y21 | C:Y22 | C:Y23 | C:Y24 | C:Y25 |
|---|-------|-------|-------|-------|-------|-------|-------|-------|-------|-------|-------|-------|
| 1 | 0.5   | 0     | 0.5   | 0.5   | 1.5   | 0.5   | 4.5   | 0.5   | 3.5   | 4     | 1.5   | 4     |

Data for Figure 4B\_Corneal Scarring

|   | C:Y26 | C:Y27 | C:Y28 | C:Y29 | C:Y30 | C:Y31 | C:Y32 | C:Y33 | C:Y34 | C:Y35 | C:Y36 | C:Y37 |
|---|-------|-------|-------|-------|-------|-------|-------|-------|-------|-------|-------|-------|
| 1 | 4     | 0.5   | 4     | 3     | 3     | 1     | 3     | 1     | 4     | 0.5   | 1     | 0     |

Data for Figure 4B. Corneal Scarring



|   | C:Y38 | C:Y39 | C:Y40 | C:Y41 | C:Y42 | C:Y43 | C:Y44 | C:Y45 | C:Y46 | C:Y47 | C:Y48 | C:Y49 |
|---|-------|-------|-------|-------|-------|-------|-------|-------|-------|-------|-------|-------|
| 1 | 4.5   | 4     | 2     | 1     | 4     | 4     | 4     | 4     | 4     | 2     | 2.5   | 2.5   |

Data for Figure 4B\_Corneal Scarring

|   | C:Y50 | C:Y51 | C:Y52 | C:Y53 | C:Y54 | C:Y55 | C:Y56 | C:Y57 | C:Y58 | C:Y59 | C:Y60 | C:Y61 |
|---|-------|-------|-------|-------|-------|-------|-------|-------|-------|-------|-------|-------|
| 1 | 1.5   | 4     | 1.5   | 1     | 0.5   | 2     | 1     | 0.5   | 0.5   | 1     | 2.5   | 1     |

Data for Figure 4B\_Corneal Scarring

Group C

dLAT2903

|   | C:Y62 | C:Y63 | C:Y64 | C:Y65 | C:Y66 | C:Y67 | C:Y68 | C:Y69 | C:Y70 | C:Y71 | C:Y72 | C:Y73 |
|---|-------|-------|-------|-------|-------|-------|-------|-------|-------|-------|-------|-------|
| 1 | 1     | 1.5   | 0.5   | 1     | 0.5   | 3     | 0.5   | 1     | 1     | 1     | 0.5   | 1     |

Data for Figure 4B Corneal Scarring

|   | C:Y74 | C:Y75 | C:Y76 | C:Y77 | C:Y78 | C:Y79 | C:Y80 | C:Y81 | C:Y82 | C:Y83 | C:Y84 | C:Y85 |
|---|-------|-------|-------|-------|-------|-------|-------|-------|-------|-------|-------|-------|
| 1 | 1     | 4     | 1     | 0     | 2     | 0     | 2     | 0     | 0     | 3     | 0     | 2     |

Data for Figure 4B\_Corneal Scarring

|   | C:Y86 | C:Y87 | C:Y88 | C:Y89 | C:Y90 | C:Y91 | C:Y92 | C:Y93 | C:Y94 | C:Y95 | C:Y96 | C:Y97 |
|---|-------|-------|-------|-------|-------|-------|-------|-------|-------|-------|-------|-------|
| 1 | 0     | 0     | 0     | 1.5   | 3     | 0     | 0     | 1.5   | 3     | 2.5   | 0     | 1.5   |

Data for Figure 4B Corneal Scarring

|   | C:Y98 | C:Y99 | C:Y100 | C:Y101 | C:Y102 | C:Y103 | C:Y104 | C:Y105 | C:Y106 | C:Y107 | C:Y108 | C:Y109 |
|---|-------|-------|--------|--------|--------|--------|--------|--------|--------|--------|--------|--------|
| 1 | 4     | 1     | 4      | 0      | 0      | 3.5    | 0      | 3      | 0      | 3      | 4      | 0      |

Data for Figure 4B Corneal Scarring

|   | C:Y110 | C:Y111 | C:Y112 | C:Y113 | C:Y114 | C:Y115 | C:Y116 | C:Y117 | C:Y118 | C:Y119 | C:Y120 | C:Y121 |
|---|--------|--------|--------|--------|--------|--------|--------|--------|--------|--------|--------|--------|
| 1 | 0      | 0      | 0.75   | 1      | 4      | 1      | 1      | 0      | 1      | 3      | 1      | 0      |

Data for Figure 4B Corneal Scarring

|   | C:Y122 | C:Y123 | C:Y124 | C:Y125 | C:Y126 | C:Y127 | C:Y128 | C:Y129 | C:Y130 | C:Y131 | C:Y132 | C:Y133 |
|---|--------|--------|--------|--------|--------|--------|--------|--------|--------|--------|--------|--------|
| 1 | 2      | 1.5    | 1      | 4      | 4      | 4      | 1      | 1.5    | 4      | 0.75   | 4      | 1.5    |

Data for Figure 4B\_Corneal Scarring



|   | C:Y134 | C:Y135 | C:Y136 | C:Y137 | C:Y138 | C:Y139 | C:Y140 | C:Y141 | C:Y142 | C:Y143 |
|---|--------|--------|--------|--------|--------|--------|--------|--------|--------|--------|
| 1 | 1      | 0.5    | 2      | 0.75   | 2      | 3      | 1      | 2.5    |        |        |

Data for Figure 4B\_Corneal Scarring

| Table format:<br><b>XY</b> |              | <b>X</b>       |             |             |             |             |             |             |             |             |             |              |              |
|----------------------------|--------------|----------------|-------------|-------------|-------------|-------------|-------------|-------------|-------------|-------------|-------------|--------------|--------------|
|                            |              | <b>X Title</b> |             |             |             |             |             |             |             |             |             |              |              |
|                            |              | <b>X</b>       | <b>A:Y1</b> | <b>A:Y2</b> | <b>A:Y3</b> | <b>A:Y4</b> | <b>A:Y5</b> | <b>A:Y6</b> | <b>A:Y7</b> | <b>A:Y8</b> | <b>A:Y9</b> | <b>A:Y10</b> | <b>A:Y11</b> |
| <b>1</b>                   | <b>Title</b> |                | 9           | 16          | 6           | 6           | 0           | 0           | 16          | 9           | 16          | 5            | 2            |

Data for Figure 4C\_Angiogenesis

|   | A:Y12 | A:Y13 | A:Y14 | A:Y15 | A:Y16 | A:Y17 | A:Y18 | A:Y19 | A:Y20 | A:Y21 | A:Y22 | A:Y23 |
|---|-------|-------|-------|-------|-------|-------|-------|-------|-------|-------|-------|-------|
| 1 | 2     | 16    | 11    | 4     | 2     | 4     | 4     | 4     | 6     | 0     | 16    | 16    |

Data for Figure 4C\_Angiogenesis

|   | A:Y24 | A:Y25 | A:Y26 | A:Y27 | A:Y28 | A:Y29 | A:Y30 | A:Y31 | A:Y32 | A:Y33 | A:Y34 | A:Y35 |
|---|-------|-------|-------|-------|-------|-------|-------|-------|-------|-------|-------|-------|
| 1 | 2     | 16    | 4     | 6     | 16    | 4     | 2     | 7     | 0     | 9     | 0     | 16    |

Data for Figure 4C\_Angiogenesis

|   | A:Y36 | A:Y37 | A:Y38 | A:Y39 | A:Y40 | A:Y41 | A:Y42 | A:Y43 | A:Y44 | A:Y45 | A:Y46 | A:Y47 |
|---|-------|-------|-------|-------|-------|-------|-------|-------|-------|-------|-------|-------|
| 1 | 4     | 4     | 16    | 6     | 16    | 16    | 2     | 2     | 4     | 16    | 5     | 4     |

Data for Figure 4C\_Angiogenesis

|   | A:Y48 | A:Y49 | A:Y50 | A:Y51 | A:Y52 | A:Y53 | A:Y54 | A:Y55 | A:Y56 | A:Y57 | A:Y58 | A:Y59 |
|---|-------|-------|-------|-------|-------|-------|-------|-------|-------|-------|-------|-------|
| 1 | 16    | 6     | 4     | 0     | 16    | 4     | 2     | 6     | 4     | 4     | 5     | 16    |

Data for Figure 4C\_Angiogenesis

|   | A:Y60 | A:Y61 | A:Y62 | A:Y63 | A:Y64 | A:Y65 | A:Y66 | A:Y67 | A:Y68 | A:Y69 | A:Y70 | A:Y71 |
|---|-------|-------|-------|-------|-------|-------|-------|-------|-------|-------|-------|-------|
| 1 | 4     | 4     | 16    | 6     | 16    | 10    | 16    | 6     | 10    | 16    | 16    | 2     |

Data for Figure 4C\_Angiogenesis

| Group A |       |       |       |       |       |       |       |       |       |       |       |       |
|---------|-------|-------|-------|-------|-------|-------|-------|-------|-------|-------|-------|-------|
| McKrae  |       |       |       |       |       |       |       |       |       |       |       |       |
|         | A:Y72 | A:Y73 | A:Y74 | A:Y75 | A:Y76 | A:Y77 | A:Y78 | A:Y79 | A:Y80 | A:Y81 | A:Y82 | A:Y83 |
| 1       | 0     | 0     | 0     | 0     | 0     | 0     | 16    | 0     | 16    | 2     | 1     | 0     |

Data for Figure 4C\_Angiogenesis



|   | A:Y84 | A:Y85 | A:Y86 | A:Y87 | A:Y88 | A:Y89 | A:Y90 | A:Y91 | A:Y92 | A:Y93 | A:Y94 | A:Y95 |
|---|-------|-------|-------|-------|-------|-------|-------|-------|-------|-------|-------|-------|
| 1 | 2     | 0     | 0     | 2     | 0     | 16    | 0     | 0     | 0     | 0     | 0     | 14    |

Data for Figure 4C\_Angiogenesis

|   | A:Y96 | A:Y97 | A:Y98 | A:Y99 | A:Y100 | A:Y101 | A:Y102 | A:Y103 | A:Y104 | A:Y105 | A:Y106 | A:Y107 |
|---|-------|-------|-------|-------|--------|--------|--------|--------|--------|--------|--------|--------|
| 1 | 0     | 2     | 0     | 0     | 0      | 0      | 16     | 16     | 3      | 2      | 0      | 4      |

Data for Figure 4C\_Angiogenesis

|   | A:Y108 | A:Y109 | A:Y110 | A:Y111 | A:Y112 | A:Y113 | A:Y114 | A:Y115 | A:Y116 | A:Y117 | A:Y118 | A:Y119 |
|---|--------|--------|--------|--------|--------|--------|--------|--------|--------|--------|--------|--------|
| 1 | 0      | 3      | 0      | 14     | 6      | 2      | 10     | 16     | 6      | 10     | 0      | 12     |

Data for Figure 4C\_Angiogenesis

|   | A:Y120 | A:Y121 | A:Y122 | A:Y123 | A:Y124 | A:Y125 | A:Y126 | A:Y127 | A:Y128 | A:Y129 | A:Y130 | A:Y131 |
|---|--------|--------|--------|--------|--------|--------|--------|--------|--------|--------|--------|--------|
| 1 | 12     | 0      | 0      | 16     | 6      | 16     | 8      | 6      | 0      |        |        |        |

Data for Figure 4C\_Angiogenesis

|   | A:Y132 | A:Y133 | A:Y134 | A:Y135 | A:Y136 | A:Y137 | A:Y138 | A:Y139 | A:Y140 | A:Y141 | A:Y142 | A:Y143 |
|---|--------|--------|--------|--------|--------|--------|--------|--------|--------|--------|--------|--------|
| 1 |        |        |        |        |        |        |        |        |        |        |        |        |

Data for Figure 4C\_Angiogenesis

|   | B:Y1 | B:Y2 | B:Y3 | B:Y4 | B:Y5 | B:Y6 | B:Y7 | B:Y8 | B:Y9 | B:Y10 | B:Y11 | B:Y12 |
|---|------|------|------|------|------|------|------|------|------|-------|-------|-------|
| 1 | 2    | 2    | 2    | 4    | 1    | 2    | 2    | 0    | 2    | 2     | 0     | 2     |

Data for Figure 4C\_Angiogenesis

|   | B:Y13 | B:Y14 | B:Y15 | B:Y16 | B:Y17 | B:Y18 | B:Y19 | B:Y20 | B:Y21 | B:Y22 | B:Y23 | B:Y24 |
|---|-------|-------|-------|-------|-------|-------|-------|-------|-------|-------|-------|-------|
| 1 | 2     | 6     | 2     | 2     | 2     | 2     | 2     | 2     | 2     | 6     | 4     | 2     |

Data for Figure 4C\_Angiogenesis

|   | B:Y25 | B:Y26 | B:Y27 | B:Y28 | B:Y29 | B:Y30 | B:Y31 | B:Y32 | B:Y33 | B:Y34 | B:Y35 | B:Y36 |
|---|-------|-------|-------|-------|-------|-------|-------|-------|-------|-------|-------|-------|
| 1 | 16    | 3     | 4     | 0     | 16    | 12    | 7     | 16    | 8     | 16    | 2     | 2     |

Data for Figure 4C\_Angiogenesis



|   | B:Y37 | B:Y38 | B:Y39 | B:Y40 | B:Y41 | B:Y42 | B:Y43 | B:Y44 | B:Y45 | B:Y46 | B:Y47 | B:Y48 |
|---|-------|-------|-------|-------|-------|-------|-------|-------|-------|-------|-------|-------|
| 1 | 0     | 16    | 0     | 16    | 16    | 16    | 16    | 10    | 3     | 16    | 16    | 16    |

Data for Figure 4C\_Angiogenesis

|   | B:Y49 | B:Y50 | B:Y51 | B:Y52 | B:Y53 | B:Y54 | B:Y55 | B:Y56 | B:Y57 | B:Y58 | B:Y59 | B:Y60 |
|---|-------|-------|-------|-------|-------|-------|-------|-------|-------|-------|-------|-------|
| 1 | 16    | 2     | 16    | 16    | 9     | 4     | 16    | 16    | 0     | 2     | 4     | 6     |

Data for Figure 4C\_Angiogenesis

| Group B            |       |       |       |       |       |       |       |       |       |       |       |       |
|--------------------|-------|-------|-------|-------|-------|-------|-------|-------|-------|-------|-------|-------|
| $\Delta$ sncRNA1&2 |       |       |       |       |       |       |       |       |       |       |       |       |
|                    | B:Y61 | B:Y62 | B:Y63 | B:Y64 | B:Y65 | B:Y66 | B:Y67 | B:Y68 | B:Y69 | B:Y70 | B:Y71 | B:Y72 |
| 1                  | 4     | 2     | 3     | 16    | 2     | 2     | 4     | 1     | 6     | 4     | 4     | 16    |

Data for Figure 4C\_Angiogenesis

|   | B:Y73 | B:Y74 | B:Y75 | B:Y76 | B:Y77 | B:Y78 | B:Y79 | B:Y80 | B:Y81 | B:Y82 | B:Y83 | B:Y84 |
|---|-------|-------|-------|-------|-------|-------|-------|-------|-------|-------|-------|-------|
| 1 | 2     | 16    | 2     | 16    | 2     | 0     | 16    | 0     | 0     | 16    | 0     | 0     |

Data for Figure 4C\_Angiogenesis

|   | B:Y85 | B:Y86 | B:Y87 | B:Y88 | B:Y89 | B:Y90 | B:Y91 | B:Y92 | B:Y93 | B:Y94 | B:Y95 | B:Y96 |
|---|-------|-------|-------|-------|-------|-------|-------|-------|-------|-------|-------|-------|
| 1 | 0     | 16    | 0     | 16    | 3     | 2     | 14    | 16    | 0     | 2     | 0     | 0     |

Data for Figure 4C\_Angiogenesis

|   | B:Y97 | B:Y98 | B:Y99 | B:Y100 | B:Y101 | B:Y102 | B:Y103 | B:Y104 | B:Y105 | B:Y106 | B:Y107 | B:Y108 |
|---|-------|-------|-------|--------|--------|--------|--------|--------|--------|--------|--------|--------|
| 1 | 0     | 16    | 16    | 2      | 16     | 16     | 7      | 2      | 0      | 0      | 16     | 16     |

Data for Figure 4C\_Angiogenesis

|   | B:Y109 | B:Y110 | B:Y111 | B:Y112 | B:Y113 | B:Y114 | B:Y115 | B:Y116 | B:Y117 | B:Y118 | B:Y119 | B:Y120 |
|---|--------|--------|--------|--------|--------|--------|--------|--------|--------|--------|--------|--------|
| 1 | 7      | 0      | 0      | 0      | 2      | 4      | 10     | 6      | 14     | 4      | 4      | 4      |

Data for Figure 4C\_Angiogenesis

|   | B:Y121 | B:Y122 | B:Y123 | B:Y124 | B:Y125 | B:Y126 | B:Y127 | B:Y128 | B:Y129 | B:Y130 | B:Y131 | B:Y132 |
|---|--------|--------|--------|--------|--------|--------|--------|--------|--------|--------|--------|--------|
| 1 | 14     | 16     | 0      | 16     | 16     | 6      | 0      | 16     |        |        |        |        |

Data for Figure 4C\_Angiogenesis



|   |               |               |               |               |               |               |               |               |               |               |               |             |
|---|---------------|---------------|---------------|---------------|---------------|---------------|---------------|---------------|---------------|---------------|---------------|-------------|
|   |               |               |               |               |               |               |               |               |               |               |               |             |
|   | <b>B:Y133</b> | <b>B:Y134</b> | <b>B:Y135</b> | <b>B:Y136</b> | <b>B:Y137</b> | <b>B:Y138</b> | <b>B:Y139</b> | <b>B:Y140</b> | <b>B:Y141</b> | <b>B:Y142</b> | <b>B:Y143</b> | <b>C:Y1</b> |
| 1 |               |               |               |               |               |               |               |               |               |               |               | 2           |

Data for Figure 4C\_Angiogenesis

|   | C:Y2 | C:Y3 | C:Y4 | C:Y5 | C:Y6 | C:Y7 | C:Y8 | C:Y9 | C:Y10 | C:Y11 | C:Y12 | C:Y13 |
|---|------|------|------|------|------|------|------|------|-------|-------|-------|-------|
| 1 | 2    | 0    | 2    | 2    | 3    | 2    | 16   | 2    | 13    | 2     | 16    | 2     |

Data for Figure 4C\_Angiogenesis

|   | C:Y14 | C:Y15 | C:Y16 | C:Y17 | C:Y18 | C:Y19 | C:Y20 | C:Y21 | C:Y22 | C:Y23 | C:Y24 | C:Y25 |
|---|-------|-------|-------|-------|-------|-------|-------|-------|-------|-------|-------|-------|
| 1 | 2     | 0     | 16    | 16    | 2     | 2     | 16    | 16    | 5     | 16    | 16    | 2     |

Data for Figure 4C\_Angiogenesis

|   | C:Y26 | C:Y27 | C:Y28 | C:Y29 | C:Y30 | C:Y31 | C:Y32 | C:Y33 | C:Y34 | C:Y35 | C:Y36 | C:Y37 |
|---|-------|-------|-------|-------|-------|-------|-------|-------|-------|-------|-------|-------|
| 1 | 16    | 0     | 12    | 2     | 12    | 16    | 16    | 16    | 16    | 10    | 10    | 8     |

Data for Figure 4C\_Angiogenesis

|   | C:Y38 | C:Y39 | C:Y40 | C:Y41 | C:Y42 | C:Y43 | C:Y44 | C:Y45 | C:Y46 | C:Y47 | C:Y48 | C:Y49 |
|---|-------|-------|-------|-------|-------|-------|-------|-------|-------|-------|-------|-------|
| 1 | 8     | 0     | 16    | 16    | 16    | 16    | 16    | 7     | 16    | 0     | 0     | 16    |

Data for Figure 4C\_Angiogenesis

|   | C:Y50 | C:Y51 | C:Y52 | C:Y53 | C:Y54 | C:Y55 | C:Y56 | C:Y57 | C:Y58 | C:Y59 | C:Y60 | C:Y61 |
|---|-------|-------|-------|-------|-------|-------|-------|-------|-------|-------|-------|-------|
| 1 | 16    | 16    | 16    | 2     | 16    | 4     | 4     | 4     | 7     | 4     | 2     | 2     |

Data for Figure 4C\_Angiogenesis

| Group C  |       |       |       |       |       |       |       |       |       |       |       |       |
|----------|-------|-------|-------|-------|-------|-------|-------|-------|-------|-------|-------|-------|
| dLAT2903 |       |       |       |       |       |       |       |       |       |       |       |       |
|          | C:Y62 | C:Y63 | C:Y64 | C:Y65 | C:Y66 | C:Y67 | C:Y68 | C:Y69 | C:Y70 | C:Y71 | C:Y72 | C:Y73 |
| 1        | 4     | 8     | 6     | 4     | 3     | 2     | 2     | 4     | 6     | 4     | 6     | 6     |

Data for Figure 4C\_Angiogenesis

|   | C:Y74 | C:Y75 | C:Y76 | C:Y77 | C:Y78 | C:Y79 | C:Y80 | C:Y81 | C:Y82 | C:Y83 | C:Y84 | C:Y85 |
|---|-------|-------|-------|-------|-------|-------|-------|-------|-------|-------|-------|-------|
| 1 | 8     | 2     | 2     | 6     | 16    | 0     | 0     | 0     | 0     | 5     | 0     | 0     |

Data for Figure 4C\_Angiogenesis



|   | C:Y86 | C:Y87 | C:Y88 | C:Y89 | C:Y90 | C:Y91 | C:Y92 | C:Y93 | C:Y94 | C:Y95 | C:Y96 | C:Y97 |
|---|-------|-------|-------|-------|-------|-------|-------|-------|-------|-------|-------|-------|
| 1 | 16    | 0     | 0     | 0     | 2     | 6     | 16    | 0     | 2     | 0     | 2     | 0     |

Data for Figure 4C\_Angiogenesis

|   | C:Y98 | C:Y99 | C:Y100 | C:Y101 | C:Y102 | C:Y103 | C:Y104 | C:Y105 | C:Y106 | C:Y107 | C:Y108 | C:Y109 |
|---|-------|-------|--------|--------|--------|--------|--------|--------|--------|--------|--------|--------|
| 1 | 5     | 0     | 0      | 5      | 0      | 5      | 0      | 0      | 0      | 0      | 2      | 0      |

Data for Figure 4C\_Angiogenesis

|   | C:Y110 | C:Y111 | C:Y112 | C:Y113 | C:Y114 | C:Y115 | C:Y116 | C:Y117 | C:Y118 | C:Y119 | C:Y120 | C:Y121 |
|---|--------|--------|--------|--------|--------|--------|--------|--------|--------|--------|--------|--------|
| 1 | 0      | 0      | 6      | 5      | 8      | 0      | 0      | 0      | 2      | 2      | 0      | 2      |

Data for Figure 4C\_Angiogenesis

|   | C:Y122 | C:Y123 | C:Y124 | C:Y125 | C:Y126 | C:Y127 | C:Y128 | C:Y129 | C:Y130 | C:Y131 | C:Y132 | C:Y133 |
|---|--------|--------|--------|--------|--------|--------|--------|--------|--------|--------|--------|--------|
| 1 | 5      | 6      | 3      | 16     | 16     | 16     | 4      | 5      | 16     | 2      | 16     | 3      |

Data for Figure 4C\_Angiogenesis

|   | C:Y134 | C:Y135 | C:Y136 | C:Y137 | C:Y138 | C:Y139 | C:Y140 | C:Y141 | C:Y142 | C:Y143 |
|---|--------|--------|--------|--------|--------|--------|--------|--------|--------|--------|
| 1 | 4      | 2      | 6      | 3      | 6      | 8      | 4      | 7      |        |        |

Data for Figure 4C\_Angiogenesis

| Table format:<br>Column |       | Group A | Group B    | Group C            | Group D | Group E  |
|-------------------------|-------|---------|------------|--------------------|---------|----------|
|                         |       | McKrae  | Data Set-B | $\Delta$ sncRNA1&2 | Title   | dLAT2903 |
|                         |       |         |            |                    |         |          |
| 1                       | Title | 4       |            | 4                  |         | 6        |
| 2                       | Title | 4       |            | 4                  |         | 6        |
| 3                       | Title | 4       |            | 4                  |         | 9        |
| 4                       | Title | 4       |            | 4                  |         | 6        |
| 5                       | Title | 4       |            | 4                  |         | 9        |
| 6                       | Title | 4       |            | 4                  |         | 9        |
| 7                       | Title | 4       |            | 4                  |         | 9        |
| 8                       | Title | 4       |            | 5                  |         | 6        |
| 9                       | Title | 4       |            | 5                  |         | 9        |
| 10                      | Title | 4       |            | 5                  |         | 8        |
| 11                      | Title | 5       |            |                    |         | 9        |
| 12                      | Title | 5       |            |                    |         | 5        |
| 13                      | Title | 6       |            | 4                  |         | 9        |
| 14                      | Title |         |            | 4                  |         | 8        |
| 15                      | Title | 4       |            | 4                  |         | 8        |
| 16                      | Title | 4       |            | 4                  |         | 5        |
| 17                      | Title | 5       |            | 4                  |         | 8        |
| 18                      | Title | 5       |            | 4                  |         | 5        |
| 19                      | Title | 5       |            | 4                  |         | 8        |
| 20                      | Title | 5       |            | 4                  |         | 8        |
| 21                      | Title | 5       |            | 4                  |         |          |
| 22                      | Title | 6       |            | 4                  |         |          |
| 23                      | Title | 6       |            | 4                  |         |          |
| 24                      | Title | 6       |            | 4                  |         |          |
| 25                      | Title |         |            | 5                  |         |          |
| 26                      | Title |         |            | 5                  |         |          |
| 27                      | Title |         |            | 5                  |         |          |
| 28                      | Title |         |            | 5                  |         |          |
| 29                      | Title |         |            | 5                  |         |          |
| 30                      | Title | 3       |            | 3                  |         | 4        |
| 31                      | Title | 3       |            | 3                  |         | 4        |

Data for Figure 5A\_Reactivation

| Table format: |       | Group A | Group B    | Group C            | Group D | Group E  |
|---------------|-------|---------|------------|--------------------|---------|----------|
| Column        |       | McKrae  | Data Set-B | $\Delta$ sncRNA1&2 | Title   | dLAT2903 |
|               |       |         |            |                    |         |          |
| 32            | Title | 4       |            | 3                  |         | 4        |
| 33            | Title | 4       |            | 3                  |         | 4        |
| 34            | Title | 4       |            | 3                  |         | 4        |
| 35            | Title | 4       |            | 4                  |         | 4        |
| 36            | Title | 4       |            | 4                  |         | 4        |
| 37            | Title | 4       |            | 4                  |         | 4        |
| 38            | Title | 5       |            | 4                  |         | 5        |
| 39            | Title | 6       |            | 4                  |         | 5        |
| 40            | Title | 7       |            | 4                  |         | 6        |
| 41            | Title |         |            | 4                  |         |          |

Data for Figure 5A\_Reactivation

| Table format:<br>Grouped |       |             |            |             |             |             |             |            |             |             |             |             |
|--------------------------|-------|-------------|------------|-------------|-------------|-------------|-------------|------------|-------------|-------------|-------------|-------------|
|                          |       | A:1         | A:2        | A:3         | A:4         | A:5         | A:6         | A:7        | A:8         | A:9         | A:10        | A:11        |
| 1                        | Title | 1374848.578 | 728096.043 | 1657335.831 | 1119750.250 | 1002506.246 | 3031264.799 | 274323.157 | 1521597.604 | 1984769.190 | 1287722.144 | 1035197.414 |

Data for Figure 5B\_gB DNA copy#



| Group A |             |            |            |             |             |             |             |             |            |             |            |             |
|---------|-------------|------------|------------|-------------|-------------|-------------|-------------|-------------|------------|-------------|------------|-------------|
| McKrae  |             |            |            |             |             |             |             |             |            |             |            |             |
|         | A:12        | A:13       | A:14       | A:15        | A:16        | A:17        | A:18        | A:19        | A:20       | A:21        | A:22       | A:23        |
| 1       | 1862648.634 | 356945.819 | 969541.378 | 2403598.000 | 4741895.000 | 1153131.000 | 1284796.000 | 1581992.000 | 348439.000 | 1145655.000 | 949073.900 | 1687186.000 |

Data for Figure 5B\_gB DNA copy#

|   | A:24        | A:25        | A:26        | A:27        | A:28       | A:29        | A:30        | A:31        | A:32        | A:33 | A:34 | A:35 |
|---|-------------|-------------|-------------|-------------|------------|-------------|-------------|-------------|-------------|------|------|------|
| 1 | 2653161.000 | 1113900.000 | 2858148.000 | 2634926.000 | 798589.900 | 2622754.000 | 2404432.000 | 1070780.000 | 1142209.000 |      |      |      |

Data for Figure 5B\_gB DNA copy#

|   | A:36 | A:37 | A:38 | A:39 | A:40 | B:1         | B:2         | B:3         | B:4         | B:5          | B:6         |
|---|------|------|------|------|------|-------------|-------------|-------------|-------------|--------------|-------------|
| 1 |      |      |      |      |      | 653003.7899 | 600313.9602 | 876883.0328 | 877553.9412 | 1344091.6840 | 402417.5701 |

Data for Figure 5B. gB DNA copy#

|   | B:7          | B:8          | B:9         | B:10         | B:11         | B:12        | B:13         | B:14        | B:15         | B:16         | B:17        |
|---|--------------|--------------|-------------|--------------|--------------|-------------|--------------|-------------|--------------|--------------|-------------|
| 1 | 1010511.5250 | 1769900.6680 | 788366.2755 | 1459923.6070 | 1369638.3680 | 940775.6270 | 1385707.0000 | 162152.4000 | 1065372.0000 | 1220572.0000 | 467872.2000 |

Data for Figure 5B\_gB DNA copy#

| Group B            |              |              |              |              |             |              |        |           |             |              |             |
|--------------------|--------------|--------------|--------------|--------------|-------------|--------------|--------|-----------|-------------|--------------|-------------|
| $\Delta$ sncRNA1&2 |              |              |              |              |             |              |        |           |             |              |             |
|                    | B:18         | B:19         | B:20         | B:21         | B:22        | B:23         | B:24   | B:25      | B:26        | B:27         | B:28        |
| 1                  | 1613087.0000 | 2972839.0000 | 1010930.0000 | 1679710.0000 | 470787.3000 | 2445026.0000 | 0.0000 | 4870.8260 | 276102.7000 | 2680539.0000 | 375832.1000 |

Data for Figure 5B\_gB DNA copy#

|   | B:29         | B:30         | B:31 | B:32 | B:33 | B:34 | B:35 | B:36 | B:37 | B:38 | B:39 |
|---|--------------|--------------|------|------|------|------|------|------|------|------|------|
| 1 | 1712640.0000 | 1587316.0000 |      |      |      |      |      |      |      |      |      |

Data for Figure 5B\_qB DNA copy#

|   | B:40 | C:1         | C:2         | C:3         | C:4          | C:5         | C:6          | C:7         | C:8          | C:9          | C:10        |
|---|------|-------------|-------------|-------------|--------------|-------------|--------------|-------------|--------------|--------------|-------------|
| 1 |      | 127782.6288 | 530491.7274 | 156249.6420 | 1187495.0600 | 317824.4000 | 1146534.8340 | 288462.6183 | 1613701.7180 | 1302325.8110 | 752764.5332 |

Data for Figure 5B\_gB DNA copy#

| Group C  |              |             |              |            |            |              |            |            |              |              |             |
|----------|--------------|-------------|--------------|------------|------------|--------------|------------|------------|--------------|--------------|-------------|
| dLAT2903 |              |             |              |            |            |              |            |            |              |              |             |
|          | C:11         | C:12        | C:13         | C:14       | C:15       | C:16         | C:17       | C:18       | C:19         | C:20         | C:21        |
| 1        | 1243069.8820 | 966844.2961 | 2257604.0020 | 29301.1769 | 34163.2900 | 1303142.0000 | 81333.1200 | 41979.0900 | 2803185.0000 | 2720103.0000 | 314142.4000 |

Data for Figure 5B\_gB DNA copy#



|   | C:22       | C:23       | C:24        | C:25         | C:26        | C:27         | C:28       | C:29 | C:30 | C:31 | C:32 |
|---|------------|------------|-------------|--------------|-------------|--------------|------------|------|------|------|------|
| 1 | 69056.5400 | 83273.7400 | 102174.3000 | 2285612.0000 | 610182.9000 | 2227944.0000 | 85812.0800 |      |      |      |      |

Data for Figure 5B\_gB DNA copy#

|   | C:33 | C:34 | C:35 | C:36 | C:37 | C:38 | C:39 | C:40 |
|---|------|------|------|------|------|------|------|------|
| 1 |      |      |      |      |      |      |      |      |

Data for Figure 5B\_gB DNA copy#

|                                 |       |            |            |            |            |            |            |            |            |
|---------------------------------|-------|------------|------------|------------|------------|------------|------------|------------|------------|
| Table format:<br><b>Grouped</b> |       |            |            |            |            |            |            |            |            |
|                                 |       | <b>A:1</b> | <b>A:2</b> | <b>A:3</b> | <b>A:4</b> | <b>A:5</b> | <b>A:6</b> | <b>A:7</b> | <b>A:8</b> |
| 1                               | Title | 272476.92  | 448766.16  | 3314760.30 | 2007424.70 | 1510329.60 | 315458.30  | 1740326.10 | 27037.93   |

Data for Figure 6A LAT copy# in TG

|   | A:9       | A:10       | A:11     | A:12      | A:13       | A:14      | A:15      | A:16     | A:17       |
|---|-----------|------------|----------|-----------|------------|-----------|-----------|----------|------------|
| 1 | 993527.87 | 1123639.70 | 49651.43 | 201283.48 | 1057127.00 | 836111.57 | 710162.00 | 44739.08 | 1490542.57 |

Data for Figure 6A LAT copy# in TG

|   | A:18      | A:19      | A:20      | A:21      | A:22      | A:23      | A:24      | A:25      | A:26      |
|---|-----------|-----------|-----------|-----------|-----------|-----------|-----------|-----------|-----------|
| 1 | 871165.74 | 218955.29 | 851278.11 | 6.55e+008 | 2.29e+008 | 1.87e+009 | 1.59e+009 | 2.14e+008 | 1.79e+009 |

Data for Figure 6A LAT copy# in TG

| Group A |           |           |           |           |           |           |           |           |           |
|---------|-----------|-----------|-----------|-----------|-----------|-----------|-----------|-----------|-----------|
| McKrae  |           |           |           |           |           |           |           |           |           |
|         | A:27      | A:28      | A:29      | A:30      | A:31      | A:32      | A:33      | A:34      | A:35      |
| 1       | 1.56e+009 | 6.47e+009 | 2.15e+008 | 5.39e+009 | 1.88e+009 | 3.86e+008 | 2.00e+009 | 7.94e+009 | 9.09e+009 |

Data for Figure 6A\_LAT copy# in TG

|   | A:36      | A:37      | A:38      | A:39      | A:40      | A:41      | A:42      | A:43      | A:44      |
|---|-----------|-----------|-----------|-----------|-----------|-----------|-----------|-----------|-----------|
| 1 | 4.01e+009 | 6.68e+009 | 4.06e+009 | 1.05e+010 | 5.62e+009 | 1.38e+010 | 4.90e+009 | 5.98e+009 | 7.64e+009 |

Data for Figure 6A\_LAT copy# in TG

|   | A:45      | A:46      | A:47      | A:48      | A:49      | A:50      | A:51 | A:52 | A:53 |
|---|-----------|-----------|-----------|-----------|-----------|-----------|------|------|------|
| 1 | 3.04e+009 | 5.96e+008 | 6.10e+009 | 2.15e+010 | 1.63e+010 | 2.52e+010 |      |      |      |

Data for Figure 6A LAT copy# in TG



|   | A:54 | A:55 | B:1     | B:2   | B:3     | B:4     | B:5     | B:6   | B:7     |
|---|------|------|---------|-------|---------|---------|---------|-------|---------|
| 1 |      |      | 1294395 | 55382 | 4572475 | 3537222 | 1160750 | 50001 | 1979691 |

Data for Figure 6A\_LAT copy# in TG

|   | B:8     | B:9     | B:10    | B:11   | B:12   | B:13    | B:14   | B:15    | B:16    |
|---|---------|---------|---------|--------|--------|---------|--------|---------|---------|
| 1 | 2588634 | 1215539 | 1668266 | 317435 | 846112 | 1962605 | 363647 | 2672069 | 1374385 |

Data for Figure 6A LAT copy# in TG

|   | B:17    | B:18   | B:19   | B:20    | B:21    | B:22   | B:23   | B:24   | B:25   |
|---|---------|--------|--------|---------|---------|--------|--------|--------|--------|
| 1 | 1040589 | 118854 | 324904 | 1010757 | 1428948 | 605446 | 134728 | 3e+009 | 7e+009 |

Data for Figure 6A LAT copy# in TG

| Group B            |        |        |        |        |        |        |        |        |        |
|--------------------|--------|--------|--------|--------|--------|--------|--------|--------|--------|
| $\Delta$ sncRNA1&2 |        |        |        |        |        |        |        |        |        |
|                    | B:26   | B:27   | B:28   | B:29   | B:30   | B:31   | B:32   | B:33   | B:34   |
| 1                  | 2e+010 | 1e+010 | 9e+009 | 6e+009 | 6e+009 | 9e+009 | 8e+009 | 1e+010 | 2e+010 |

Data for Figure 6A\_LAT copy# in TG

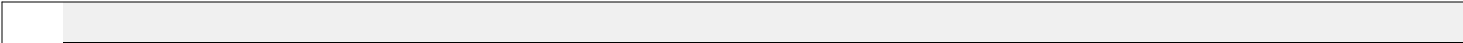

|   | B:35   | B:36   | B:37   | B:38   | B:39   | B:40   | B:41   | B:42   | B:43   |
|---|--------|--------|--------|--------|--------|--------|--------|--------|--------|
| 1 | 2e+010 | 3e+010 | 2e+010 | 2e+010 | 1e+010 | 2e+010 | 2e+010 | 3e+010 | 5e+009 |

Data for Figure 6A\_LAT copy# in TG

|   | B:44   | B:45   | B:46   | B:47   | B:48   | B:49   | B:50 | B:51 | B:52 |
|---|--------|--------|--------|--------|--------|--------|------|------|------|
| 1 | 4e+010 | 2e+010 | 9e+009 | 3e+010 | 2e+010 | 3e+010 |      |      |      |

Data for Figure 6A\_LAT copy# in TG

|   | B:53 | B:54 | B:55 |
|---|------|------|------|
| 1 |      |      |      |

Data for Figure 6A\_LAT copy# in TG

| Table format:<br>Grouped |    | Group A     |             |             | Group B            |             |             |
|--------------------------|----|-------------|-------------|-------------|--------------------|-------------|-------------|
|                          |    | McKrae      |             |             | $\Delta$ sncRNA1&2 |             |             |
|                          |    | A:1         | A:2         | A:3         | B:1                | B:2         | B:3         |
| 1                        | 12 | 783100.1900 | 1381342.300 | 1335890.590 | 7070122.950        | 8384506.760 | 7699317.750 |
| 2                        | 24 | 7.398810063 | 1.081404326 | 1.958002965 | 4.491973615        | 3.293251759 | 3.079439043 |
| 3                        | 48 | 4.330859586 | 3.609599898 | 5.025007011 | 6.847714102        | 1.190241803 | 7.004140384 |

Data for Figure 6B\_ LAT copy# in Neuro 2A



| Table format:<br>Grouped |       | Group A |      |      |      |      |      | Group B |     |     |     |     |
|--------------------------|-------|---------|------|------|------|------|------|---------|-----|-----|-----|-----|
|                          |       | Mock    |      |      |      |      |      | McKrae  |     |     |     |     |
|                          |       | A:1     | A:2  | A:3  | A:4  | A:5  | A:6  | B:1     | B:2 | B:3 | B:4 | B:5 |
| 1                        | Title | 7.12    | 2.68 | 5.00 | 2.96 | 2.76 | 2.53 | 44      | 47  | 47  | 23  | 19  |

Data for Figure 7B\_cleaved Caspase 3

|   |     | Group C   |      |      |      |      |      | Group D  |      |      |      |      |
|---|-----|-----------|------|------|------|------|------|----------|------|------|------|------|
|   |     | sncRNA1&2 |      |      |      |      |      | dLAT2903 |      |      |      |      |
|   | B:6 | C:1       | C:2  | C:3  | C:4  | C:5  | C:6  | D:1      | D:2  | D:3  | D:4  | D:5  |
| 1 | 11  | 55.4      | 63.1 | 59.3 | 57.1 | 59.3 | 59.1 | 58.6     | 62.6 | 60.5 | 58.5 | 47.0 |

Data for Figure 7B\_cleaved Caspase 3

|   |      |
|---|------|
|   |      |
|   |      |
|   | D:6  |
| 1 | 58.7 |

Data for Figure 7B\_cleaved Caspase 3
